# Supplementary material for: Elucidating the interaction of limonene with bovine serum albumin: a multi-technique approach
Source: Royal Society of Chemistry journal article supplement (doi:10.1039/c4mb00548a), 2014-10-23
Supplement: c4mb00548a1.pdf [file c4mb00548a1.pdf]

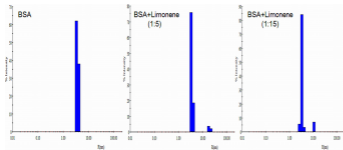

Supplementary figure 1. DLS pattern of BSA-limonene interaction showing Rh distributions.
